# Supplementary material for: Sun-induced Fluorescence and Near Infrared Reflectance of vegetation track the seasonal dynamics of gross primary production over Africa
Source: Copernicus journal article supplement (doi:10.5194/bg-2020-242), 2020-08-12
Supplement: Supplementary file 1 [file bg-2020-242-supplement.pdf]

# Supporting information for Sun-induced Fluorescence and Near Infrared Reflectance of vegetation track the seasonal dynamics of gross primary production over Africa

Anteneh Getachew Mengistu<sup>1,4</sup>, Gizaw Mengistu Tsidu<sup>1,2</sup>, Gerbrand Koren<sup>3</sup>, Maurits L. Kooreman<sup>4</sup>, K. Folkert Boersma<sup>3,4</sup>, Torbern Tagesson<sup>6,7</sup>, Jonas Ardö<sup>6</sup>, Yann Nouvellon<sup>8,9</sup>, and Wouter Peters<sup>3,5</sup>

<sup>1</sup>Department of Physics, Addis Ababa University, Addis Ababa, Ethiopia

<sup>2</sup>Department of Earth and Environment, Botswana International University of Science and Technology, Palapye, Botswana

<sup>3</sup>Wageningen University, Meteorology and Air Quality Group, Wageningen, The Netherlands

<sup>4</sup>Royal Netherlands Meteorological Institute, De Bilt, The Netherlands

<sup>5</sup>University of Groningen, Centre for Isotope Research, Groningen, The Netherlands

<sup>6</sup>Department of Physical Geography and Ecosystem Science, Lund University, Sweden

<sup>7</sup>Department of Geosciences and Natural Resource Management, University of Copenhagen, Denmark

<sup>8</sup>Eco&Sols, Univ Montpellier, CIRAD, INRA, IRD, Montpellier SupAgro, 34060 Montpellier, France

<sup>9</sup>CIRAD, UMR Eco&Sols, 34060 Montpellier, France

**Correspondence:** Anteneh (antenehgetachew7@gmail.com)

## S1 Supplementary Tables and figures

**Table S1.** Correlations of NIRv and EC-GPP for tropical evergreen broadleaf forest site (GH-Ank).

| Correlation | Spatial res.  | Temporal res. | vegetation masking | IAV included | Ref     |
|-------------|---------------|---------------|--------------------|--------------|---------|
| R = -0.44   | 4° × 4°       | monthly       | yes                | climatology  | Fig. 2  |
| R = 0.02    | 0.5° × 0.5°   | daily         | No                 | IAV included | Fig. 3  |
| R = 0.28    | 0.05° × 0.05° | daily         | No                 | IAV included | Fig. 3  |
| R = 0.21    | 4° × 4°       | monthly       | yes                | IAV included | Fig. S1 |

**Table S2.** Linear regression results for NIRv and SIF with MPI-BGC GPP over major biomes of Africa temporally averaged for the years (2007 - 2011). y is the GPP inferred from NIRv/SIF and x is the NIRv/SIF signal. R is the spatial correlation coefficient between these signals and MPI-BGC GPP.

| Biome            | MPI-BGC GPP ( $\frac{kg\ C}{m^2\ yr}$ ) & NIRv<br>fitting equation | R <sup>2</sup> | MPI-BGC GPP & SIF ( $\frac{m\ W}{sr\ m^2\ nm}$ )<br>fitting equation | R <sup>2</sup> | Number of data points |
|------------------|--------------------------------------------------------------------|----------------|----------------------------------------------------------------------|----------------|-----------------------|
| Broad leaf       |                                                                    |                |                                                                      |                |                       |
| evergreen Forest | y = 9.06*x + 0.51                                                  | 0.38           | y = 1.07*x + 1.58                                                    | 0.16           | 574                   |
| C3 grass         | y = 10.33*x - 0.24                                                 | 0.86           | y = 1.92*x + 0.10                                                    | 0.77           | 480                   |
| Shrub Northern   |                                                                    |                |                                                                      |                |                       |
| Africa           | y = 10.97*x - 0.41                                                 | 0.98           | y = 1.91*x - 0.03                                                    | 0.92           | 265                   |
| Shrub Southern   |                                                                    |                |                                                                      |                |                       |
| Africa           | y = 13.55*x - 0.62                                                 | 0.96           | y = 2.51*x - 0.10                                                    | 0.83           | 325                   |
| C4 grass         |                                                                    |                |                                                                      |                |                       |
| Northern Africa  | y = 12.54*x - 0.73                                                 | 0.88           | y = 2.23*x - 0.54                                                    | 0.86           | 1382                  |
| C4 grass         |                                                                    |                |                                                                      |                |                       |
| Southern Africa  | y = 13.79*x - 0.75                                                 | 0.85           | y = 2.55*x - 0.38                                                    | 0.83           | 1108                  |

**Table S3.** comparison of biome specific estimates of five years mean GPP covering the period from 2007 to 2011 for major biomes of Africa as derived from: linear regression of SIF/NIRv-vs-EC-GPP and Max-Planck Ensemble GPP (MPI-GPP).

|                                       | BLEF | Shrub NH | Shrub SH | C3 grass | C4 grass NH | C4 grass SH |
|---------------------------------------|------|----------|----------|----------|-------------|-------------|
| SIF-GPP ( $kg\ C\ m^{-2}\ yr^{-1}$ )  | 2.52 | 1.34     | 0.90     | 1.15     | 1.04        | 0.82        |
| NIRv-GPP ( $kg\ C\ m^{-2}\ yr^{-1}$ ) | 2.53 | 1.81     | 0.3      | 1.18     | 1.33        | 1.26        |
| MPI-GPP ( $kg\ C\ m^{-2}\ yr^{-1}$ )  | 2.44 | 1.24     | 1.19     | 1.10     | 1.01        | 1.15        |

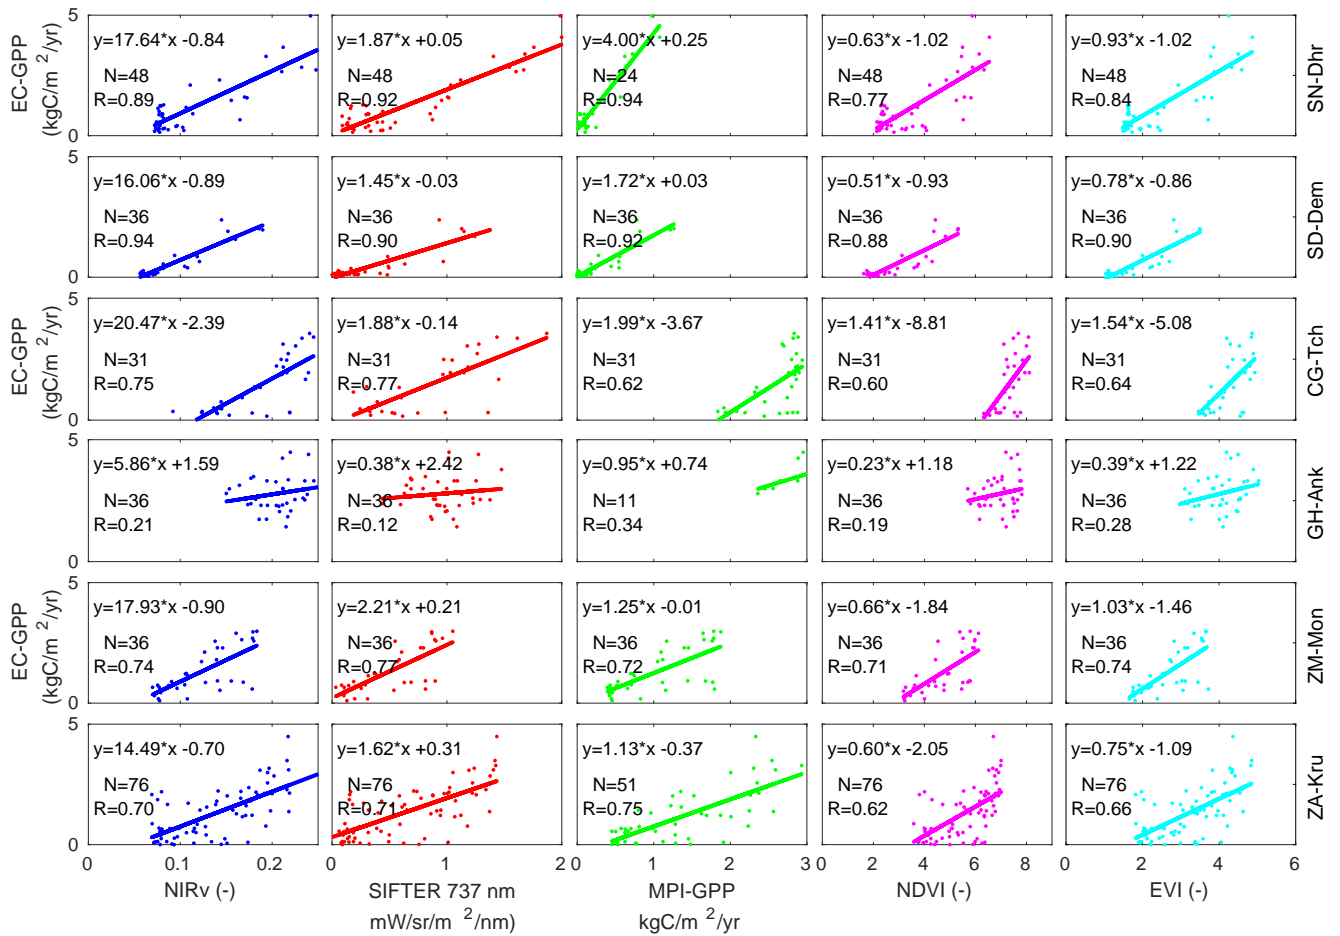

**Figure S1.** Comparison of eddy covariance GPP with NIRv, SIF, MPI-BGC GPP, NDVI and EVI for major biomes around the flux-tower. To obtain sufficient data the comparison is made by averaging monthly values within a  $4^{\circ} \times 4^{\circ}$  window enclosing the tower. Furthermore, to account for vegetation heterogeneity of the land, grid cells with a different vegetation type than for the tower location were masked.

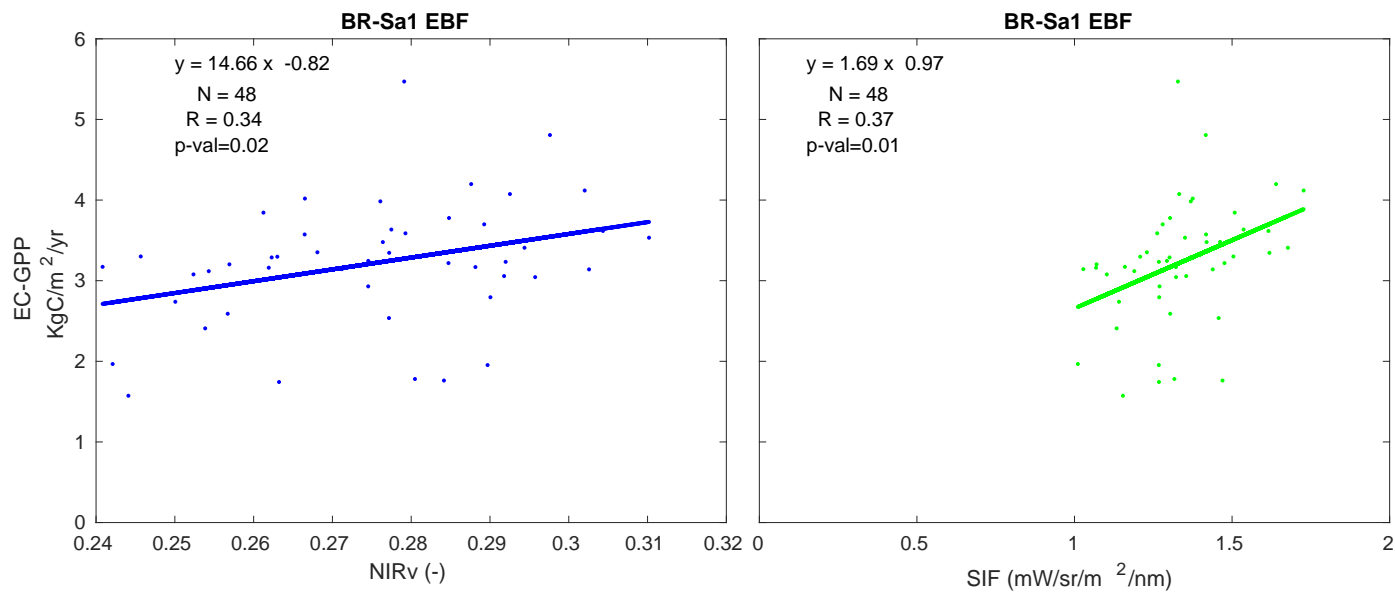

**Figure S2.** Comparison of eddy covariance GPP with NIRv and SIF around the Brazil BR-Sa1 flux tower. To obtain sufficient data the comparison is made by averaging monthly values within a  $4^\circ \times 4^\circ$  window enclosing the tower. Furthermore, to account for vegetation heterogeneity of the land, grid cells with a different vegetation type than for the tower location (evergreen broad-leaf forest) were masked. The regression slope and intercepts are used to infer GPP from NIRv and SIF over African broad-leaf evergreen forest.

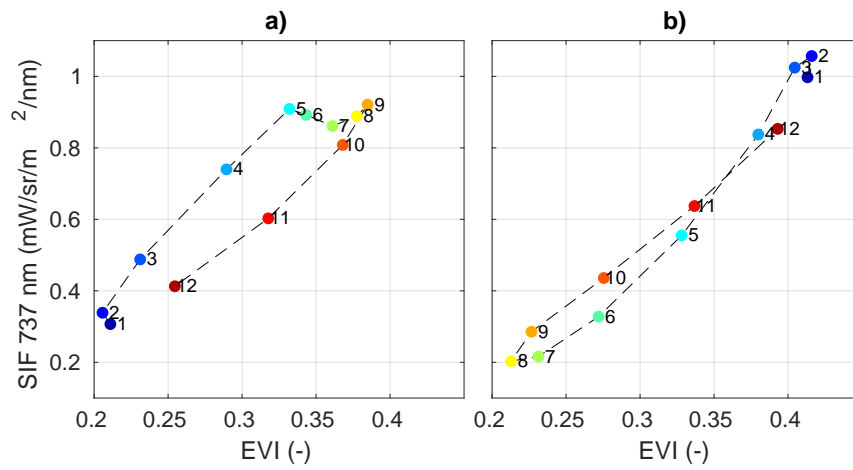

**Figure S3.** Seasonal values SIF versus EVI as a response of C3 grass and shrub vegetation types of Africa a) North of the equator and b) South of the equator.
